# Supplementary material for: Increase in Growth Cone Size Correlates with Decrease in Neurite Growth Rate
Source: Neural Plast. 2016 May 4;2016:3497901. doi: 10.1155/2016/3497901 (PMC4870373; doi:10.1155/2016/3497901)
Supplement: Supplementary file 1 — Video 1. DIC time-lapse imaging of Aplysia growth cones on PLL-coated coverslip 48 h after plating. C domain in the large growth cone (left) swayed and split, while the P domain remained largely stationary except for small scale protrusions and retractions. In contrast, the small growth cone (right) advanced at the same time. Scale bar and time as indicated. Time compression: 1200x. Data for Figure 4a was taken from this video. Video 2. DIC time-lapse imaging of Aplysia growth cone on PLL-coated coverslip 53 h after plating. A smaller growth cone showed persistent advancement of about 20 μm in 3 h. Scale bar and time as indicated. Time compression: 1200x. Data for Figure 4b was taken from this video. Video 3. DIC time-lapse imaging of two Aplysia growth cones on PLL-coated coverslip immediately after plating and followed for 12 h. The formation of extensive lamellipodia coincided with cessation of motility of left growth cone 1 (GC1 in Figure 5a). At 7 h, the stage was repositioned. The right growth cone 2 (GC2) resumed rapid advance at 9 h. Scale bar and time as indicated. Time compression: 5250x. Data for Figure 5a was taken from this video. Video 4. DIC time-lapse imaging of Aplysia growth cone at the interface of PLL-coated coverslip and collagen I gel. Growth cone was compact and small, exhibited more filopodia than lamellipodia, and showed persistent advancement of about 20 μm in 3 h. Scale bar and time as indicated. Time compression: 1200x. Data for Figure 6 was taken from this video. [file 3497901.f1.zip]

Archive with 4 entries (4 files):
- Video 1_Figure 4a.mov
- Video 2_Figure 4b.mov
- Video 3_Figure 5.mov
- Video 4_Figure 6.mov
